# Supplementary material for: Risk quantification for SARS-CoV-2 infection through airborne transmission in university settings
Source: bioRxiv or medRxiv preprint supplement (doi:10.1101/2021.03.31.21254731), 2021-04-06
Supplement: Supplementary file [file media-1.pdf]

## SUPPLEMENTAL INFORMATION

**S1 Table. Descriptions of five generic university spaces**

|                                                | <b>Space 1</b>          | <b>Space 2</b>         | <b>Space 3</b>         | <b>Space 4</b>          | <b>Space 5</b>         |
|------------------------------------------------|-------------------------|------------------------|------------------------|-------------------------|------------------------|
| <b>Positivity Rate</b>                         | 0.5%                    | 1%                     | 0.7%                   | 0.9%                    | 0.6%                   |
| <b>Room Volume</b>                             | 125,000 ft <sup>3</sup> | 20,000 ft <sup>3</sup> | 30,000 ft <sup>3</sup> | 200,000 ft <sup>3</sup> | 20,000 ft <sup>3</sup> |
| <b>Air Exchange Rate</b>                       | 1 exchange/hr           | 1.5 exchanges/hr       | 3 exchanges/hr         | 1 exchange/hr           | 3 exchanges/hr         |
| <b>Filtration Efficiency of Face Mask Worn</b> | 80%                     | 70%                    | 90%                    | 60%                     | 75%                    |
| <b>Normal Room Capacity</b>                    | 500                     | 100                    | 20                     | 1000                    | 5                      |
| <b>Time per Visit</b>                          | 1.5 hr                  | 1 hr                   | 1.5 hr                 | 1.5 hr                  | 5 min                  |
| <b>Total # of Visits per Semester</b>          | 180                     | 252                    | 180                    | 180                     | 420                    |

*\* Note if one of these space variables is the x variable for a graph in Figures 3 and 4, the variable will cover the full range of values indicated in the graph rather than the value listed in the table here.*
